# Supplementary material for: Zn3(4-OOCC6H4PO3)2: A polar metal phosphonate with pillared layered structure showing SHG-activity and large dielectric anisotropy
Source: Royal Society of Chemistry journal article supplement (doi:10.1039/c0dt00647e), 2010-01-01
Supplement: c0dt00647e.pdf [file c0dt00647e.pdf]

## Supporting information

### **Zn<sub>3</sub>(4-OOCC<sub>6</sub>H<sub>4</sub>PO<sub>3</sub>)<sub>2</sub> : A polar metal phosphonate with pillared layered structure showing SHG-activity and large dielectric anisotropy**

Jin-Tang Li,<sup>a</sup> Deng-Ke Cao,<sup>a</sup> Tomoyuki Akutagawa,<sup>b</sup> Li-Min Zheng<sup>a,\*</sup>

#### **Experimental.**

**Methods.** The elemental analyses were performed in a PE240C elemental analyzer. The infrared spectra were recorded on a VECTOR 22 spectrometer with pressed KBr pellets. The powder XRD patterns were recorded on a Shimadzu XD-3A X-ray diffractometer. Approximate estimations of second-order-nonlinear optical intensity were obtained by comparison of the results obtained from a powder sample (80±150 μm diameter) in the form of a pellet (Kurtz powder test<sup>11</sup>) with those obtained for urea. A pulsed Q-switched Nd:YAG laser at a wavelength of 1064 nm was used to generate the SHG signal. The backward-scattered SHG light was collected using a spherical concave mirror and passed through a filter that transmits only 532 nm radiation.

#### **Temperature dependent anisotropic dielectric measurements.**

Temperature-dependent dielectric constants were measured by the two-probe AC impedance method at the frequencies from 1 to 1000 kHz (HP4194A). A single crystal (dimension: 1.5 x 1.0 x 0.7 mm<sup>3</sup>) was placed into a cryogenic refrigerating system (Daikin PS24SS). The electrical contacts were prepared using gold paste (Tokuriki 8560) to attach the 10-μm φ gold wires to the single crystal.

**Table S1** Selected bond lengths [Å] and angles [°] for **1**

|              |           |              |           |
|--------------|-----------|--------------|-----------|
| Zn1-O1       | 2.040(6)  | Zn1-O5C      | 1.985(7)  |
| Zn1-O3       | 2.367(7)  | Zn1-O6B      | 1.980(6)  |
| Zn1-O10A     | 1.909(7)  | Zn2-O8D      | 1.883(6)  |
| Zn2-O2       | 1.921(6)  | Zn2-O4E      | 1.921(7)  |
| Zn2-O6       | 1.981(6)  | Zn3-O7G      | 1.941(6)  |
| Zn3-O3       | 1.981(6)  | Zn3-O9A      | 1.948(7)  |
| Zn3-O1F      | 2.028(6)  | P1-O1        | 1.550(6)  |
| P1-O2        | 1.483(7)  | P1-O3        | 1.533(7)  |
| P2-O6        | 1.556(6)  | P2-O8        | 1.515(6)  |
| P2-O7        | 1.496(7)  | C7-O4        | 1.252(12) |
| C7-O5        | 1.238(13) | C14-O9       | 1.232(12) |
| C14-O10      | 1.240(12) |              |           |
| O1-Zn1-O3    | 66.2(2)   | P1-O2-Zn2    | 149.0(5)  |
| O5C-Zn1-O1   | 92.0(3)   | P2-O6-Zn2    | 127.9(4)  |
| O6B-Zn1-O1   | 117.3(3)  | P2-O8-Zn2K   | 132.0(4)  |
| O10A-Zn1-O1  | 123.8(3)  | C7-O4-Zn2H   | 119.0(6)  |
| O5C-Zn1-O3   | 153.7(3)  | O8D-Zn2-O4E  | 121.3(3)  |
| O6B-Zn1-O3   | 98.6(2)   | O8D-Zn2-Zn1F | 152.5(2)  |
| O10A-Zn1-O3  | 89.7(3)   | O7G-Zn3-O3   | 115.1(3)  |
| O6B-Zn1-O5C  | 104.8(3)  | O9A-Zn3-O3   | 111.8(3)  |
| O10A-Zn1-O5C | 90.7(3)   | O3-Zn3-O1F   | 113.8(3)  |
| O10A-Zn1-O6B | 116.1(3)  | O7G-Zn3-O1F  | 99.2(3)   |
| P1-O1-Zn1    | 101.1(3)  | O9A-Zn3-O1F  | 113.3(3)  |
| P1-O3-Zn1    | 88.6(3)   | O7G-Zn3-O9A  | 102.5(3)  |
| P2-O6-Zn1F   | 127.5(4)  | P1-O3-Zn3    | 131.6(4)  |
| C7-O5-Zn1I   | 131.4(7)  | P1-O1-Zn3B   | 129.9(3)  |
| C14-O10-Zn1L | 150.3(7)  | P2-O7-Zn3J   | 151.1(5)  |
| O2-Zn2-O6    | 92.2(3)   | C14-O9-Zn3L  | 125.8(7)  |
| O4E-Zn2-O2   | 104.5(3)  | Zn3-O3-Zn1   | 112.6(3)  |
| O8D-Zn2-O2   | 110.9(3)  | Zn1F-O6-Zn2  | 104.0(3)  |
| O4E-Zn2-O6   | 109.1(3)  | Zn3B-O1-Zn1  | 128.9(3)  |
| O8D-Zn2-O6   | 114.5(3)  |              |           |

Symmetry codes: A:  $-x+2, -y+1, z-1/2$ ; B:  $x-1/2, -y+1, z$ ; C:  $-x+1, -y+1, z-1/2$ ; D:  $x-1/2, -y+2, z$ ; E:  $-x+3/2, y, z-1/2$ ; F:  $x+1/2, -y+1, z$ ; G:  $x, y-1, z$ ; H:  $-x+3/2, y, z+1/2$ ; I:  $-x+1, -y+1, z+1/2$ ; J:  $x, y+1, z$ ; K:  $x+1/2, -y+2, z$ ; L:  $-x+2, -y+1, z+1/2$ .

**Table S2.** Final Coordinates and Equivalent Isotropic Displacement Parameters of the non-Hydrogen atoms

| Atom | x           | y           | z           | U(eq)      |
|------|-------------|-------------|-------------|------------|
| Zn1  | 0.87769(7)  | 1.32017(8)  | 0.60037(3)  | 0.0184(2)  |
| Zn2  | 0.63833(6)  | 0.85888(7)  | 0.57733(3)  | 0.0168(2)  |
| Zn3  | 1.03307(7)  | 0.69438(7)  | 0.56020(3)  | 0.0166(2)  |
| P1   | 0.87853(16) | 1.01318(18) | 0.50623(8)  | 0.0149(5)  |
| P2   | 0.73965(16) | 0.53790(17) | 1.01096(8)  | 0.0147(5)  |
| O1   | 0.6495(5)   | 0.8190(5)   | 0.6797(2)   | 0.0290(16) |
| O2   | 0.5103(4)   | 0.6229(5)   | 0.6741(2)   | 0.0287(16) |
| O3   | 0.6094(4)   | 0.5325(4)   | 1.05302(18) | 0.0163(12) |
| O4   | 0.7964(4)   | 0.3742(4)   | 1.02220(19) | 0.0170(12) |
| O5   | 0.8316(4)   | 0.6598(4)   | 1.0343(2)   | 0.0237(16) |
| O6   | 0.9501(4)   | 1.2193(5)   | 0.1571(2)   | 0.0310(16) |
| O7   | 0.7440(5)   | 1.2716(6)   | 0.1757(2)   | 0.049(2)   |
| O8   | 0.7405(4)   | 1.0135(4)   | 0.53439(19) | 0.0203(12) |
| O9   | 0.9532(4)   | 1.1402(4)   | 0.54940(18) | 0.0147(12) |
| O10  | 0.9508(4)   | 0.8621(4)   | 0.5083(2)   | 0.0197(14) |
| C1   | 0.5941(6)   | 0.7018(7)   | 0.7046(3)   | 0.022(2)   |
| C2   | 0.6324(6)   | 0.6534(7)   | 0.7797(3)   | 0.019(2)   |
| C3   | 0.5571(7)   | 0.5497(7)   | 0.8171(3)   | 0.024(2)   |
| C4   | 0.5912(6)   | 0.5113(7)   | 0.8871(3)   | 0.023(2)   |
| C5   | 0.6991(6)   | 0.5760(6)   | 0.9190(3)   | 0.0143(17) |
| C6   | 0.7732(7)   | 0.6801(7)   | 0.8805(3)   | 0.026(2)   |
| C7   | 0.7397(8)   | 0.7196(8)   | 0.8109(3)   | 0.030(2)   |
| C8   | 0.8501(7)   | 1.2219(7)   | 0.1945(3)   | 0.023(2)   |
| C9   | 0.8595(7)   | 1.1640(7)   | 0.2705(3)   | 0.018(2)   |
| C10  | 0.7606(7)   | 1.2019(6)   | 0.3176(3)   | 0.0200(17) |
| C11  | 0.7674(6)   | 1.1593(6)   | 0.3894(3)   | 0.018(2)   |

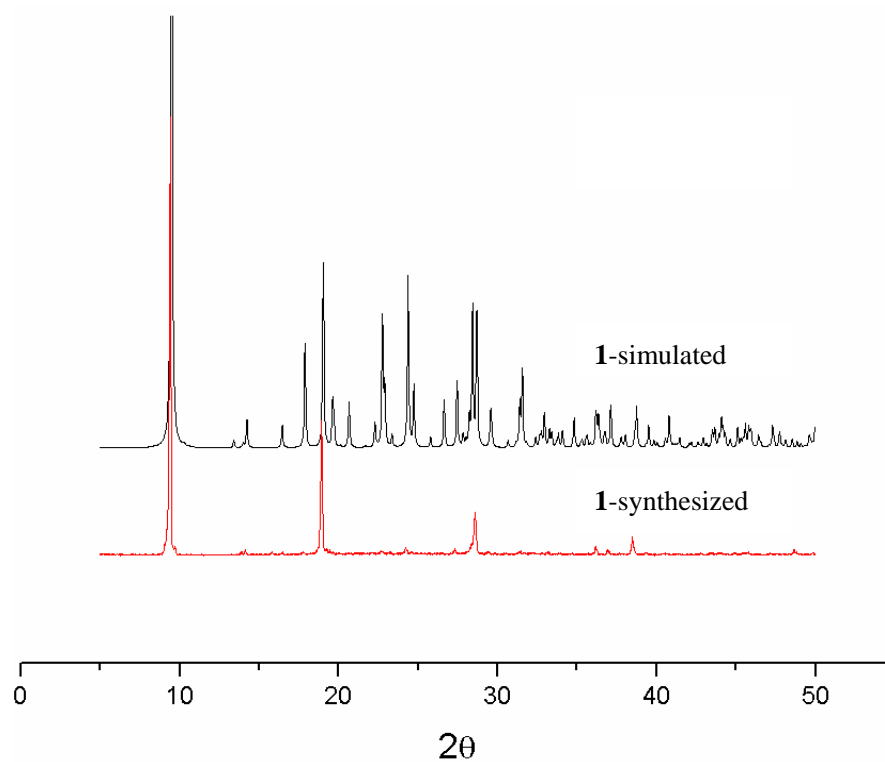

**Fig. S1.** The XRD patterns for compound 1

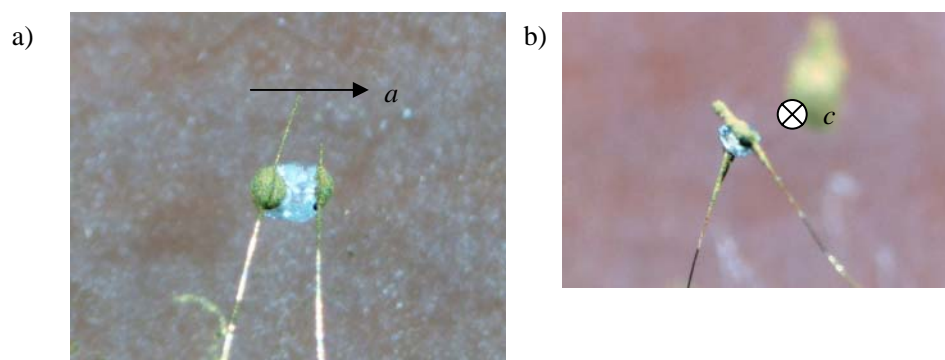

**Fig. S2.** Crystal - electrode configuration of dielectric measurements along the a) *a*- and b) *c*-axis.
